# Supplementary material
Source: publisher figshare collection journal article supplement (https://acs.figshare.com/ndownloader/files/5770665)
Supplement: Supplementary file 1 [file 5770665]

**Synthesis, Nicotinic Acetylcholine Receptor Binding, and Antinociceptive Properties of 2-*exo*-2-(2'-Substituted-3'-phenyl-5'-pyridinyl)-7-azabicyclo-[2.2.1]heptanes. Novel Nicotinic Antagonist**

F. Ivy Carroll,<sup>\*,1</sup> Jeffrey R. Lee,<sup>1</sup> Hernán A. Navarro,<sup>1</sup> Lawrence E. Brieaddy,<sup>1</sup> Philip Abraham,<sup>1</sup> M. I. Damaj,<sup>2</sup> and Billy R. Martin<sup>2</sup>

<sup>1</sup>Chemistry and Life Sciences, Research Triangle Institute, P. O. Box 12194, Research Triangle Park, NC 27709; and <sup>2</sup>Department of Pharmacology and Toxicology, Medical College of Virginia, Virginia Commonwealth University, Richmond, Virginia 23298

**Supporting Information**

| Analysis Appendix |                                                                                      |        |      |       |       |      |       |
|-------------------|--------------------------------------------------------------------------------------|--------|------|-------|-------|------|-------|
| compd             | formula                                                                              | Calcd. |      |       | Found |      |       |
|                   |                                                                                      | C      | H    | N     | C     | H    | N     |
| (±) <b>5a</b>     | C <sub>17</sub> H <sub>18</sub> ClFN <sub>2</sub> •H <sub>2</sub> O                  | 63.25  | 6.25 | 8.67  | 63.06 | 6.25 | 8.80  |
| (-) <b>5a</b>     | C <sub>17</sub> H <sub>18</sub> ClFN <sub>2</sub> •0.5H <sub>2</sub> O               | 65.07  | 5.94 | 8.93  | 65.10 | 6.02 | 8.91  |
| (+) <b>5a</b>     | C <sub>17</sub> H <sub>18</sub> ClFN <sub>2</sub> •0.33H <sub>2</sub> O              | 65.70  | 6.05 | 9.01  | 65.61 | 5.95 | 8.86  |
| <b>5b</b>         | C <sub>17</sub> H <sub>17</sub> Cl <sub>2</sub> N <sub>2</sub> •1.25H <sub>2</sub> O | 59.40  | 6.01 | 8.15  | 59.28 | 5.86 | 8.12  |
| <b>5c</b>         | C <sub>17</sub> H <sub>24</sub> N <sub>3</sub> O•2.5HCl•1.25H <sub>2</sub> O         | 53.87  | 6.38 | 11.09 | 53.95 | 6.35 | 10.68 |
| <b>5d</b>         | C <sub>19</sub> H <sub>25</sub> Cl <sub>2</sub> N <sub>3</sub> •2.25H <sub>2</sub> O | 56.09  | 7.31 | 10.33 | 55.96 | 7.40 | 9.85  |
| <b>7</b>          | C <sub>16</sub> H <sub>22</sub> BrN <sub>3</sub> O <sub>2</sub>                      | 52.18  | 6.02 | 11.41 | 52.23 | 6.11 | 11.35 |
| <b>8</b>          | C <sub>22</sub> H <sub>27</sub> N <sub>3</sub> O                                     | 72.30  | 7.45 | 11.50 | 71.74 | 7.45 | 11.26 |

**7-*tert*-Butoxycarbonyl-2-*exo*-(2'-amino-3'-bromo-5'-pyridinyl)-7-azabicyclo[2.2.1]heptane (7).** To a stirred solution of 968 mg (3.30 mmol) of 7-*tert*-Butoxycarbonyl-2-*exo*-(2'-amino-5'-pyridinyl)-7-azabicyclo[2.2.1]heptane (**6**) in methylene chloride (8 mL) and acetic acid (7 mL) under nitrogen at 0 °C was added bromine (0.260 mL, 5.05 mmol) followed by triethylamine (0.260 mL). After stirring the reaction for 16 h, the mixture was poured into 100 mL of NH<sub>4</sub>OH:H<sub>2</sub>O (1:2) solution and extracted 3 × with chloroform. The combined organic extracts were dried with magnesium sulfate and concentrated. The residue was purified by flash chromatography using 4:1 ether triethylamine to give 1.04 g (85%) of **7** as a colorless solid: mp 129–130 °C; <sup>1</sup>H NMR (CDCl<sub>3</sub>) δ (ppm) 1.44 (s, 9H), 1.40–1.55 (m, 2H), 1.70–1.84 (m, 3H), 1.90 (dd, *J* = 9.0, 12.3 Hz, 1H), 2.70 (dd, *J* = 4.8, 8.8 Hz, 1H), 4.08 (br s, 1H), 4.33 (br s, 1H), 7.62 (s, 1H, pyridyl CH), 7.83 (s, 1H, pyridyl CH); <sup>13</sup>C NMR (CDCl<sub>3</sub>) δ (ppm) 28.3 (3C), 28.7, 29.7, 40.3, 44.6, 55.7, 62.0, 79.7, 104.6, 132.9, 138.8, 145.5, 154.0, 154.9. Anal. (C<sub>16</sub>H<sub>22</sub>BrN<sub>3</sub>O<sub>2</sub>) C, H, N.

**7-*tert*-Butoxycarbonyl-2-*exo*-(2'-amino-3'-phenyl-5'-pyridinyl)-7-azabicyclo[2.2.1]heptane (8).** To a resealable reaction tube under nitrogen was added 403 mg (1.08 mmol) of 7-*tert*-butoxycarbonyl-2-*exo*-(2'-amino-3'-bromopyridinyl)-7-azabicyclo[2.2.1]heptane (**7**), Pd(OAc)<sub>2</sub> (25 mg, 0.011 mmol), P(*o*-tolyl)<sub>3</sub> (60 mg, 0.02 mmol), sodium carbonate (230 mg, 2.17 mmol), phenylboronic acid (210 mg, 1.72 mmol), degassed water (0.800 mL), and DME (4 mL). The reaction was heated at 80 °C for 1.5 h. The reaction mixture was poured into saturated sodium bicarbonate and extracted 3 × with ethyl acetate. The organic layers were dried with sodium sulfate, and concentrated. The residue was purified by flash chromatography using hexane:ethyl acetate (1:2) as eluent to provide 347 mg (88%) of **8** as a colorless solid: <sup>1</sup>H NMR (CDCl<sub>3</sub>) δ (ppm) 1.38 (br s, 9H), 1.38–1.65 (m, 2H), 1.75–2.0 (m, 4H), 2.78 (dd, *J* = 5.2, 8.6 Hz, 1H), 4.16 (s, 1H), 4.35 (s, 1H), 4.60 (br s, 2 NH), 7.3–7.45 (m, 6H), 7.92 (d, *J* = 2.2 Hz, 1H); <sup>13</sup>C NMR (CDCl<sub>3</sub>) δ (ppm) 28.2, 28.8, 29.7, 40.2, 44.8, 55.5, 62.1, 79.3, 121.6, 127.5, 128.6(2C), 128.8(2), 131.7, 136.5, 138.2, 145.6, 154.3, 154.8. Anal. (C<sub>22</sub>H<sub>27</sub>N<sub>3</sub>O<sub>2</sub>) C, H, N.

**2-*exo*-(2'-Fluoro-3'-phenyl-5'-pyridinyl)-7-azabicyclo[2.2.1]heptane (5a) Hydrochloride.** A solution of 150 mg (0.410 mmol) of 7-*tert*-butoxycarbonyl-2-*exo*-(2'-amino-3'-phenyl-5'-pyridinyl)-7-azabicyclo[2.2.1]heptane (**8**) in concentrated hydrofluoric acid/pyridine (0.6 mL) was prepared in a plastic vessel. Sodium nitrite (110 mg, 1.6 mmol) was added and the reaction mixture stirred for 45 min at room temperature followed by heating to 100 °C for 1 h. The mixture was poured into a solution of 50 mL of NH<sub>4</sub>OH:H<sub>2</sub>O (1:1) and extracted with ethyl acetate. The combined organic layers were dried with magnesium sulfate and concentrated. The

residue was purified via flash chromatography using  $\text{CHCl}_3:\text{CH}_3\text{OH}:\text{NH}_4\text{OH}$  (45:9:1) to give 91 mg (83%) of **5a** as a colorless oil:  $^1\text{H}$  NMR ( $\text{CDCl}_3$ )  $\delta$  (ppm) 1.45–1.76 (m, 4H), 1.93 (dd,  $J$  = 9.3, 12.3 Hz, 2H), 2.04 (s, 1H), 2.83 (dd,  $J$  = 6.0, 9.3 Hz, 1H), 3.62 (br s, 1H), 3.80 (br s, 1H), 7.33–7.60 (m, 5H), 7.98 (dd,  $J_F$  = 2.4, 9.6 Hz, 1H), 8.07 (t,  $J_F$  = 1.5 Hz, 1H);  $^{13}\text{C}$  NMR ( $\text{CDCl}_3$ )  $\delta$  (ppm) 29.97, 31.23, 40.32, 44.35, 56.36, 62.74, 123.01(d,  $J_{\text{CF}}$  = 28.5 Hz), 128.5 (m, 4C), 134.15 (d,  $J_{\text{CF}}$  = 5.1 Hz), 139.70 (d,  $J_{\text{CF}}$  = 4.2 Hz), 140.34 (d,  $J_{\text{CF}}$  = 18.9 Hz), 144.59 (d,  $J_{\text{CF}}$  = 57 Hz), 157.39, 160.55.

To a stirred solution of 91 mg (0.339 mmol) of **5a** in methylene chloride (2.5 mL) was added 1M HCl in ether (1.6 mL). After 30 min at room temperature, the solvent was removed under reduced pressure and the remaining solid was pumped overnight to give 90 mg (81%) of **5a**•HCl as a colorless solid. Anal. ( $\text{C}_{17}\text{H}_{18}\text{ClFN}_2\cdot\text{H}_2\text{O}$ ) C, H, N.

**(+)- and (–)-2-*exo*-(2'-Fluoro-3'-phenyl-5'-pyridinyl)-7-azabicyclo[2.2.1] heptane (+)- and (–)-5a.** To a mixture of 520 mg (1.94 mmol) of racemic 2-*exo*-(2'-fluoro-3'-phenyl-5'-pyridinyl)-7-azabicyclo[2.2.1] heptane (**5a**) and 0.80 g (0.0020 mol) of di-*p*-toluoyl-D-tartaric acid was added 45 mL of (4:1) isopropanol/water. The resulting mixture was warmed to dissolution and allowed to stand at room temperature overnight. The resulting crystals were filtered to give 0.83 g of the di-*p*-toluoyl salt of **5a**. This salt was recrystallized twice from isopropanol/water (4:1) mixtures to give 0.27 g of the tartrate salt. This salt was neutralized with aqueous  $\text{Na}_2\text{CO}_3$  and extracted with  $\text{CH}_2\text{Cl}_2$  to give 100 mg of the free base. The free base was converted to the hydrochloride salt and recrystallized from EtOAc/MeOH mixtures to give 42 mg of (–)-2-*exo*-(2'-fluoro-3'-phenyl-5'-pyridinyl)-7-azabicyclo[2.2.1] heptane hydrochloride: mp 239–242 °C;  $[\alpha]_D = -11.4$  (c 0.35, MeOH). Anal. ( $\text{C}_{17}\text{H}_{17}\text{FN}_2\text{HCl}$ ) C, H, N.

The mother liquors from above were combined and evaporated to dryness, dissolved in water, basified with  $\text{Na}_2\text{CO}_3$ , and extracted with  $\text{CH}_2\text{Cl}_2$ . The dried extracts ( $\text{Na}_2\text{SO}_4$ ) were evaporated to give 0.25 g of solid. To the solids was added 0.378 g of di-*p*-toluoyl-L-tartaric acid and 20 mL of (4:1) isopropanol/water and crystallized as above to afford 0.32 g of the tartrate salt of **5a**. The salt was converted to its free base as above to afford 0.13 g. The free base was converted to the hydrochloride salt and recrystallized from EtOAc/MeOH mixtures to afford 56 mg of (+)- 2-*exo*-(2'-fluoro-3'-phenyl-5'-pyridinyl)-7-azabicyclo[2.2.1] heptane hydrochloride hydrate: mp 240–242 °C;  $[\alpha]_D = +11.1$  (c = 0.28, MeOH). Anal. ( $\text{C}_{17}\text{H}_{18}\text{ClFN}_2\cdot 0.33\text{H}_2\text{O}$ ) C, H, N.

**2-*exo*-(2'-Amino-3'-phenyl-5'-pyridinyl)-7-azabicyclo[2.2.1]-heptane (5c) Hydrochloride.** A solution of 165 mg (0.451 mmol) of 7-*tert*-butoxycarbonyl-2-*exo*-(2'-amino-3'-phenyl-5'-pyridinyl)-7-azabicyclo[2.2.1]heptane (**8**) in methylene chloride (1.0 mL) and trifluoroacetic acid (1.0 mL) was allowed to stir at room temperature for 1 h. The reaction was decanted into a saturated NaHCO<sub>3</sub> solution and extracted 3 × with chloroform. The combined organic extracts were dried with sodium sulfate and concentrated. The residue was purified by flash chromatography using CHCl<sub>3</sub>:CH<sub>3</sub>OH:NH<sub>4</sub>OH (45:9:1) as eluent to give 116 mg (97%) of **5c** as a colorless oil: <sup>1</sup>H NMR (CDCl<sub>3</sub>) δ (ppm) 1.38–1.82 (m, 4H), 1.87 (dd, *J* = 9.0, 12.2 Hz, 1H), 2.75 (dd, *J* = 5.1, 8.67 Hz, 1H), 3.54 (br s, 1H), 3.73 (br s, 1H), 4.61 (br s, 2 H), 7.30–7.47 (m, 6H), 7.93 (s, 1H, pyridyl CH); <sup>13</sup>C NMR (CDCl<sub>3</sub>) δ (ppm) 29.71, 30.82, 39.91, 44.68, 56.28, 62.85, 121.55, 127.48, 128.61(2C), 128.82(2C), 132.28, 136.85, 138.23, 145.51, 154.15.

To a stirred solution of 96 mg (0.362 mmol) of **5c** in methylene chloride (1.5 mL) was added 1M HCl in ether (3 mL). After 1 h. at room temperature, the solvent was removed under reduced pressure, and the remaining solid was pumped overnight to give 127 mg (92%) of **5c**•HCl as a colorless solid: mp decomposed >200 °C. Anal. (C<sub>17</sub>H<sub>24</sub>N<sub>3</sub>O•2.5HCl•1.25H<sub>2</sub>O) C, H, N.

**2-*exo*-(2'-Chloro-3'-phenyl-5'-pyridinyl)-7-azabicyclo[2.2.1]heptane (5b) Hydrochloride.** To a solution of 217 mg (0.594 mmol) of 7-*tert*-butoxycarbonyl-2-*exo*-[5'-(3'-phenyl-2'-aminopyridinyl)]-7-azabicyclo[2.2.1]heptane (**8**) in concentrated hydrochloric acid (1.5 mL) was added sodium nitrite (800 mg, 11.6 mmol). Copper (I) chloride (800 mg, 8.1 mmol) was then added in small portions and stirring continued for 30 min at 0 °C. The mixture was poured into a solution of 50 mL of NH<sub>4</sub>OH:H<sub>2</sub>O (1:1) and extracted 3 × with ethyl acetate. The combined organic layers were dried with magnesium sulfate and concentrated. The residue was purified via flash chromatography using CHCl<sub>3</sub>:CH<sub>3</sub>OH:NH<sub>4</sub>OH (45:9:1) to give 100 mg (59%) of **5b** as a colorless oil: <sup>1</sup>H NMR (CDCl<sub>3</sub>) δ (ppm) 1.45–1.78 (m, 5H), 1.93 (dd, *J* = 9.0, 12.1 Hz, 1H), 2.81 (dd, *J* = 4.9, 8.9 Hz, 1H), 3.61 (br s, 1H), 3.78 (br s, 1H), 7.36–7.48 (m, 5H), 7.76 (s, pyridyl 1 CH), 8.29 (s, pyridyl 1 CH); <sup>13</sup>C NMR (CDCl<sub>3</sub>) δ (ppm) 30.07, 31.30, 40.27, 44.45, 56.28, 62.64, 127.98, 128.11(2C), 129.23(2C), 136.19, 137.69, 138–54, 141.41, 146.92, 147.33.

To a stirred solution of 70 mg (0.246 mmol) of **5b** in ether (1.5 mL) was added 1M HCl in ether (1.5 mL). After 30 min at room temperature, the solvent was removed under reduced pressure and the remaining solid was pumped overnight to give 80 mg (97%) of **5b**•HCl as a colorless solid: mp 144–147 °C; Anal. (C<sub>17</sub>H<sub>17</sub>Cl<sub>2</sub>N<sub>2</sub>•1.25H<sub>2</sub>O) C, H, N.

**7-tert-Butoxycarbonyl-2-*exo*-(2'-dimethylamino-3'-phenyl-5-pyridinyl)-7-**

**azabicyclo[2.2.1]heptane (9).** A mixture of 123 mg (0.337 mmol) of 7-*tert*-butoxycarbonyl-2-*exo*-(2'-amino-3'-phenyl-5'-pyridinyl)-7-azabicyclo[2.2.1]heptane (**8**), acetonitrile (9 mL), 37% formaldehyde (1.2 mL), and NaCNBH<sub>3</sub> (380 mg, 7.1 mmol) was allowed to stir for 3 h at room temperature. Glacial acetic acid (0.5 mL) was added and stirring continued overnight. After 24 h the reaction mixture was decanted into NH<sub>4</sub>OH:H<sub>2</sub>O (1:1) and extracted 3 × with chloroform. The combined organic extracts were dried with sodium sulfate and concentrated. The residue was purified by flash chromatography using hexane:ethyl acetate (1:2) as eluent to give 99 mg (75%) of **9** as a colorless oil: <sup>1</sup>H NMR (CDCl<sub>3</sub>) δ (ppm) 1.38 (s, 9H), 1.5–1.6 (m, 2H), 1.7–2.0 (m, 4H), 2.68 (s, 6H), 2.82 (dd, *J* = 6.0, 9.0 Hz, 1H), 4.18 br s, 1H), 4.34 (br s, 1H), 7.20–7.55 (m, 6H), 8.05 (d, *J* = 2.4 Hz, 1H); <sup>13</sup>C NMR (CDCl<sub>3</sub>) δ (ppm) 28.22 (3C), 28.72, 29.75, 40.23, 41.28 (2C), 44.77, 55.81, 62.03, 79.35, 125.43, 126.73 127.94 (2C), 128.45 (2C), 132.52, 138.28, 140.88, 144.51, 154.5, 158.74.

**2-*exo*-(2'-Dimethylamino-3'-phenyl-5'-pyridinyl)-7-azabicyclo[2.2.1]heptane (5d)**

**Dihydrochloride.** A solution of 98 mg (0.249 mmol) of 7-*tert*-butoxycarbonyl-2-*exo*-(2'-dimethylamino-3'-phenyl-5'-pyridinyl)-7-azabicyclo[2.2.1]heptane (**9**) in methylene chloride (1.5 mL) was stirred at 0 °C for 15 min. Trifluoroacetic acid (1.5 mL) was added and the reaction mixture was allowed to stir at room temperature for 30 min. The reaction mixture was decanted into a NH<sub>4</sub>OH:H<sub>2</sub>O (1:1) solution and extracted 3 × with chloroform. The combined organic extracts were dried with sodium sulfate and concentrated. The residue was purified by flash chromatography using CHCl<sub>3</sub>:CH<sub>3</sub>OH:NH<sub>4</sub>OH (80:18:2) as eluent to give (64 mg, 88%) of **5d** as a colorless oil: <sup>1</sup>H NMR (CDCl<sub>3</sub>) δ (ppm) 1.3–1.8 (m, 5H), 1.88 (dd, *J* = 9.0, 12.3 Hz, 1H), 2.04 (br s, 1H), 2.68 (s, 6H), 2.80 (dd, *J* = 6.0, 9.0 Hz, 1H), 3.57 (br s, 1H), 3.74 (br s, 1H), 7.25–7.55 (m, 6H), 8.07 (d, *J* = 2.4 Hz, 1H); <sup>13</sup>C NMR (CDCl<sub>3</sub>) δ (ppm) 29.75, 30.77, 39.84, 41.27 (2C), 44.78, 56.38; 62.78, 125.40, 126.72, 127.96 (2C), 128.49 (2C), 133.05, 138.67 140.91, 144.40, 158.56.

To a stirred solution of 61 mg (0.208 mmol) of **5d** in methylene chloride (2.0 mL) was added 1M HCl in ether (2.0 mL). After 30 min at room temperature, the solvent was removed under reduced pressure and the remaining solid was pumped overnight to give 76 mg (99%) of **5d**•2HCl as a colorless solid: mp 176–181 °C. Anal. (C<sub>19</sub>H<sub>25</sub>Cl<sub>2</sub>N<sub>3</sub>•2.25H<sub>2</sub>O) C, H, N.

**[<sup>3</sup>H]Epibatidine Binding Assay.** Adult male rat cerebral cortices (Pelfreeze Biological, Rogers, AK) were homogenized in 39 volumes of ice-cold 50 mM Tris buffer (pH 7.4 at 4 °C)

containing 120 mM NaCl, 5 mM KCl, 2 mM CaCl<sub>2</sub>, and 1 mM MgCl<sub>2</sub> and sedimented at 37,000 g for 10 min at 4 °C. The supernatant was discarded, the pellet resuspended in the original volume of buffer, and the wash procedure repeated twice more. After the last centrifugation, the pellet was resuspended in 1/10 its original homogenization volume and stored at -80 °C until needed. In a final volume of 0.5 mL, each assay tube contained 3 mg wet weight male rat cerebral cortex homogenate (added last), 0.5 nM [<sup>3</sup>H]epibatidine (NEN Life Science Products, Wilmington, DE) and one of 10–12 different concentrations of test compound dissolved in buffer (pH 7.4 at room temperature) containing 10% DMSO resulting in a final DMSO concentration of 1%. Total and nonspecific bindings were determined in the presence of vehicle and 300 uM (–)-nicotine, respectively. After a 4-h incubation at room temperature, the samples were vacuum-filtered over GF/B filter papers presoaked in 0.03% polyethylenimine using a Brandel 48-well harvester and washed with 6 mL of ice-cold buffer. The amount of radioactivity trapped on the filter was determined by standard liquid scintillation techniques in a TriCarb 2200 scintillation counter (Packard Instruments, Meriden, CT) at approximately 50% efficiency. The binding data were fit using the nonlinear regression analysis routines in Prism (Graphpad, San Diego, CA). The K<sub>i</sub> values for the test compounds were calculated from their respective IC<sub>50</sub> values using the Cheng-Prusoff equation.

**[<sup>125</sup>I]iodo-MLA Binding Assay.** Adult male rat cerebral cortices (Pel-Freez Biologicals, Rogers, AK) were homogenized (polytron) in 39 volumes of ice-cold 50 mM Tris buffer (assay buffer; pH 7.4 at 4 °C) containing 120 mM NaCl, 5 mM KCl, 2 mM CaCl<sub>2</sub>, and 1 mM MgCl<sub>2</sub>. The homogenate was centrifuged at 35,000 g for 10 min at 4 °C and the supernatant discarded. The pellet was resuspended in the original volume of buffer and the wash procedure repeated twice more. After the last centrifugation step, the pellet was resuspended in one-tenth the original homogenization volume and stored at -80 °C until needed. Triplicate samples were run in 1.4-mL polypropylene tubes (Matrix Technologies Corporation, Hudson, NH). Briefly, in a final volume of 0.5 mL, each assay sample contained 3 mg wet weight rat cerebral cortex (added last), 40–50 pM [<sup>125</sup>I]MLA and 50 nM final concentration of test compound dissolved in buffer containing 10% DMSO, giving a final DMSO concentration of 1%. Total and nonspecific binding were determined in the presence of vehicle and 300 uM (–)-nicotine, respectively. After a 2-h incubation on ice, the samples were vacuum-filtered using a Multimate 96-well harvester (Packard Instruments, Meriden, CT) onto GF/B filters presoaked for at least 30 min in assay buffer containing 0.15% bovine serum albumin. Each well was then washed with approximately 3.0 mL of ice-cold buffer. The filter plates were dried, and 30 uL of Microscint20 (Packard) was added to each well. The amount of radioligand remaining on each filter was determined using a

TopCount 12-detector (Packard) microplate scintillation counter at approximately 70% efficiency.

**Tail-flick test.** Antinociception was assessed by the tail-flick method of D'Amour and Smith.<sup>22</sup> A control response (2–4 sec) was determined for each mouse before treatment, and a test latency was determined after drug administration. In order to minimize tissue damage, a maximum latency of 10 sec was imposed. Antinociceptive response was calculated as percent maximum possible effect (% MPE), where  $\%MPE = [(test-control)/(10-control)] \times 100$ . Groups of eight to twelve animals were used for each dose and for each treatment. The mice were tested 5 min after i. t. injections of epibatidine analogs for the dose-response evaluation. Eight to twelve mice were treated per dose and a minimum of 4 doses were performed for dose-response curve determination.

**Hot-plate Test.** Mice were placed into a 10 cm wide glass cylinder on a hot plate (Thermojust Apparatus) maintained at 55.0 C. Two control latencies at least ten min apart were determined for each mouse. The normal latency (reaction time) was 8 to 12 seconds. Antinociceptive response was calculated as percent maximum possible effect (% MPE), where  $\%MPE = [(test-control)/40-control] \times 100$ . The reaction time was scored when the animal jumped or licked its paws. Eight mice per dose were injected s.c. with epibatidine analogs and tested 5 min thereafter in order to establish a dose-response curve.

**Locomotor activity.** Mice were placed into individual Omnitech photocell activity cages (28 x 16.5 cm) 5 min after s.c. administration of either 0.9% saline or epibatidine analogs. Interruptions of the photocell beams (two banks of eight cells each) were then recorded for the next 10 min. Data were expressed as number of photocell interruptions.

**Body temperature.** Rectal temperature was measured by a thermistor probe (inserted 24 mm) and digital thermometer (Yellow Springs Instrument Co., Yellow Springs, OH). Readings were taken just before and at different times after the s.c. injection of either saline or epibatidine analogs. The difference in rectal temperature before and after treatment was calculated for each mouse. The ambient temperature of the laboratory varied from 21–24°C from day to day.



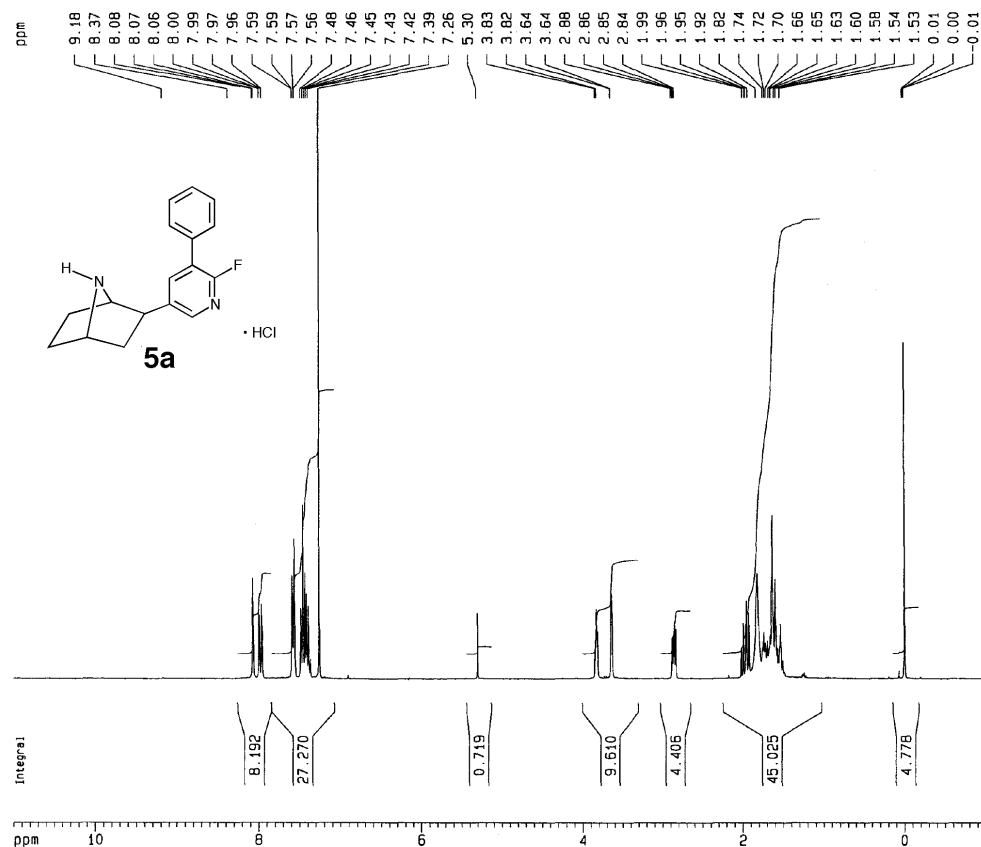

Current Data Parameters  
 NAME 1eb  
 EXPNO 250  
 PROCNO 1

F2 - Acquisition Parameters  
 Date\_ 20010222  
 Time 10.33  
 INSTRUM spect  
 PROBHD 5 mm QNP 1H/  
 PULPROG zg  
 TD 32768  
 SOLVENT CDCl3  
 NS 16  
 DS 2  
 SWH 6172.839 Hz  
 FIDRES 0.188380 Hz  
 AQ 2.6542580 sec  
 RG 724.1  
 DW 81.000 usec  
 DE 5.00 usec  
 TE 300.0 K  
 D1 1.00000000 sec  
 P1 5.50 usec  
 SF01 300.1318534 MHz  
 NUC1 1H  
 PL1 -6.00 dB

F2 - Processing parameters  
 SI 16384  
 SF 300.1300052 MHz  
 WDW EM  
 SSB 0  
 LB 0.30 Hz  
 GB 0  
 PC 1.00

1D NMR plot parameters  
 CX 20.00 cm  
 F1P 11.000 ppm  
 F1 3301.43 Hz  
 F2P -1.000 ppm  
 F2 -300.13 Hz  
 PPMCM 0.60000 ppm/cm  
 HZCM 180.07800 Hz/cm

File : C:\HPCHEM\1\DATA\SAMPLES\752747.D  
Operator : R. Mitchell  
Acquired : 17 Jul 2001 9:20 am using AcqMethod EIDIPHED  
Instrument : GC/MS Ins  
Sample Name: RTI-7527-47  
Misc Info : Abraham  
Vial Number: 1

**5a**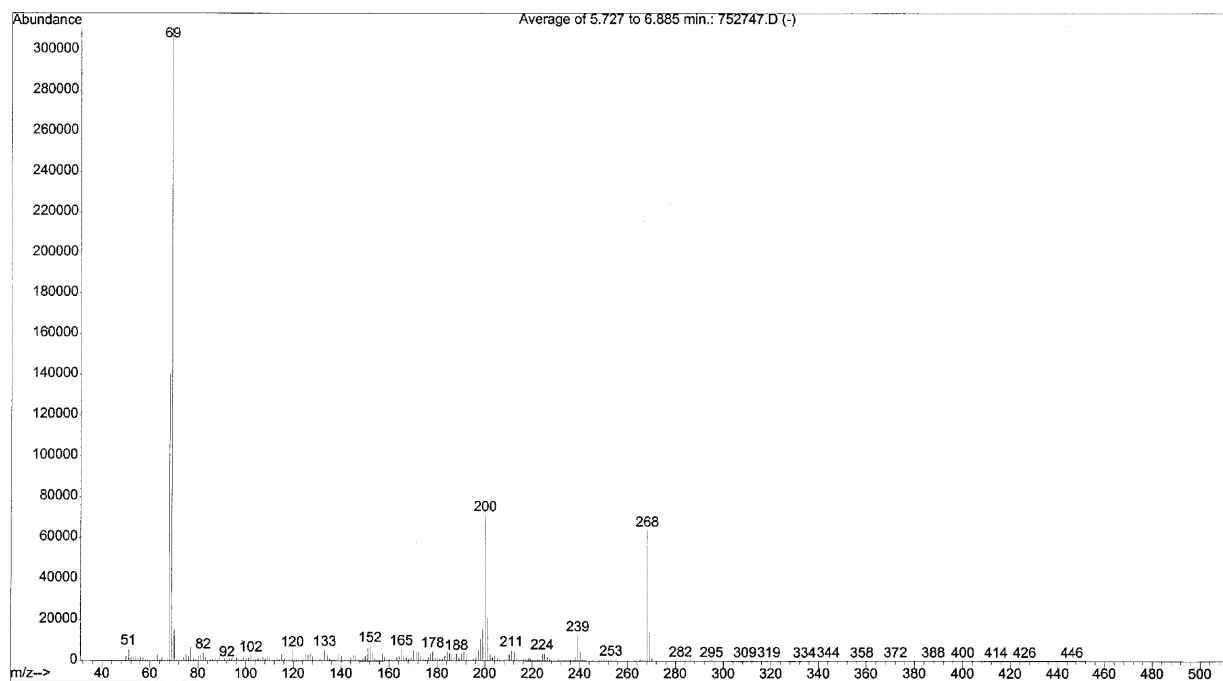

Date: Tue, Jul 17, 2001 2:54 PM  
Data: Epibatidine-17JUL101-011

5a

Sample: RTI-7527-47 (about 1 mg/ml CH<sub>3</sub>OH), A: [TFA-H<sub>2</sub>O], B: CH<sub>3</sub>CN, 25% B,  
0.6 ml/min, 225 nm, Phenomenex Synergi 4 $\mu$  Hydro-RP 80A (3\*150 mm,  
4  $\mu$ m)

Method: Epibatidine  
Inject Vol: 1  
Sampling Int: 0.1 Seconds

Data:

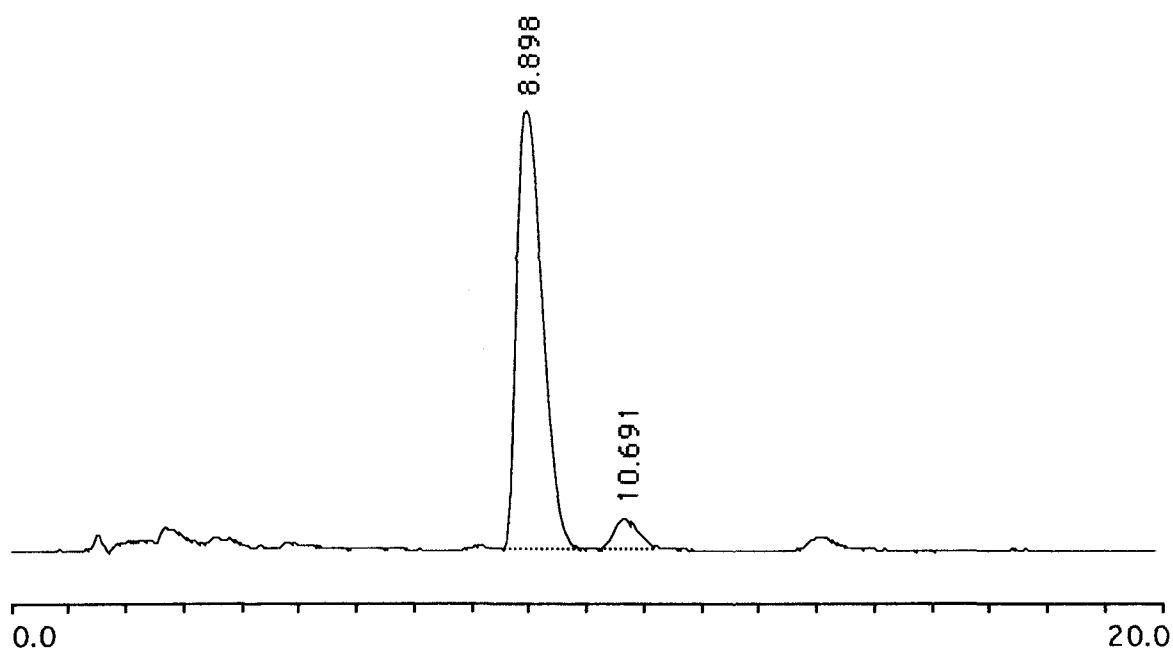

Analysis: Channel A

| Peak No.   | Time   | Type | Height( $\mu$ V) | Area( $\mu$ V-sec) | Area%  |
|------------|--------|------|------------------|--------------------|--------|
| 1          | 8.898  | N    | 60408            | 1719460            | 94.428 |
| 2          | 10.691 | N    | 3833             | 101460             | 5.571  |
| Total Area |        |      |                  | 1820920            | 99.999 |

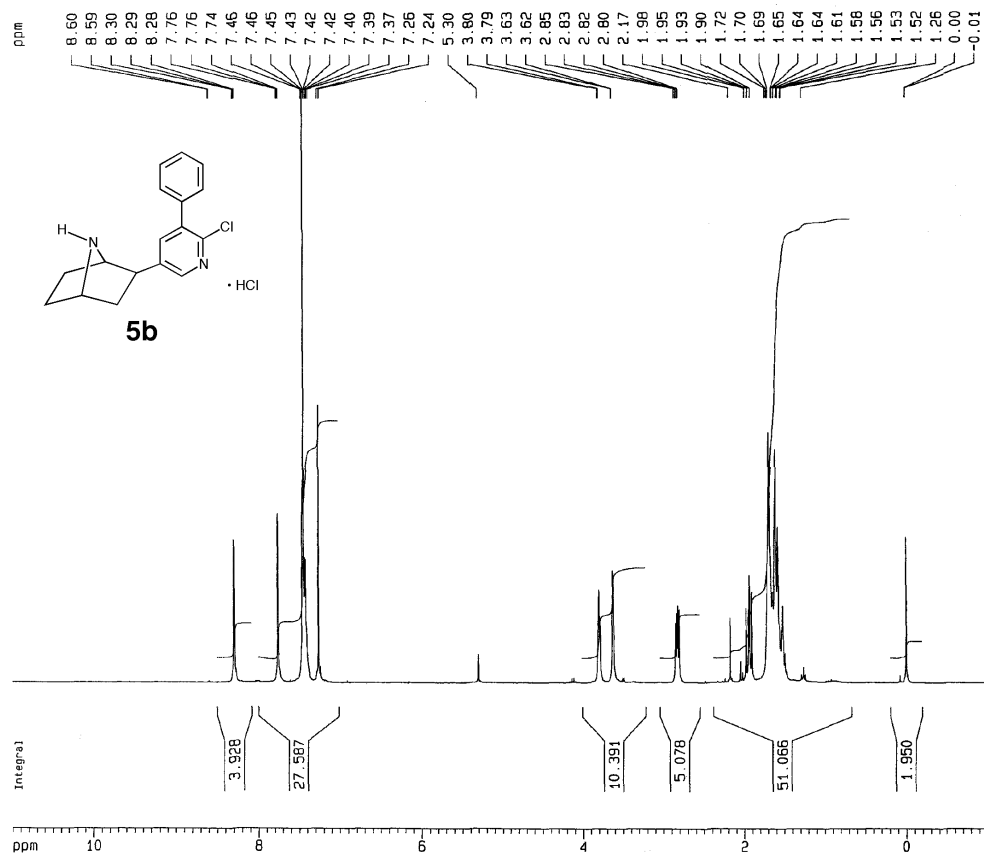

## Current Data Parameters

NAME 1eb  
EXPNO 130  
PROCNO 1

## F2 - Acquisition Parameters

Date 20000615  
Time 13.18  
INSTRUM spect  
PROBHD 5 mm QNP 1H/  
PULPROG zg  
TD 32768  
SOLVENT CDCl<sub>3</sub>  
NS 16  
DS 2  
SWH 6172.839 Hz  
FIDRES 0.188380 Hz  
AQ 2.6542580 sec  
RG 645.1  
DW 81.000 usec  
DE 6.00 usec  
TE 300.0 K  
D1 1.00000000 sec  
P1 12.00 usec  
SF01 300.1318534 MHz  
NUC1 1H  
PL1 0.00 dB

## F2 - Processing parameters

SI 16384  
SF 300.1300052 MHz  
WDW EM  
SSB 0  
LB 0.30 Hz  
GB 0  
PC 1.00

## 1D NMR plot parameters

CX 20.00 cm  
F1P 11.000 ppm  
F1 3301.43 Hz  
F2P -1.000 ppm  
F2 -300.13 Hz  
PPMCM 0.60000 ppm/cm  
HZCM 180.07800 Hz/cm

File : C:\HPCHEM\1\DATA\SAMPLES\752726.D  
Operator : R. Mitchell  
Acquired : 17 Jul 2001 7:55 am using AcqMethod EIDIPHED  
Instrument : GC/MS Ins  
Sample Name: RTI-7527-26  
Misc Info : Abraham  
Vial Number: 1

**5b**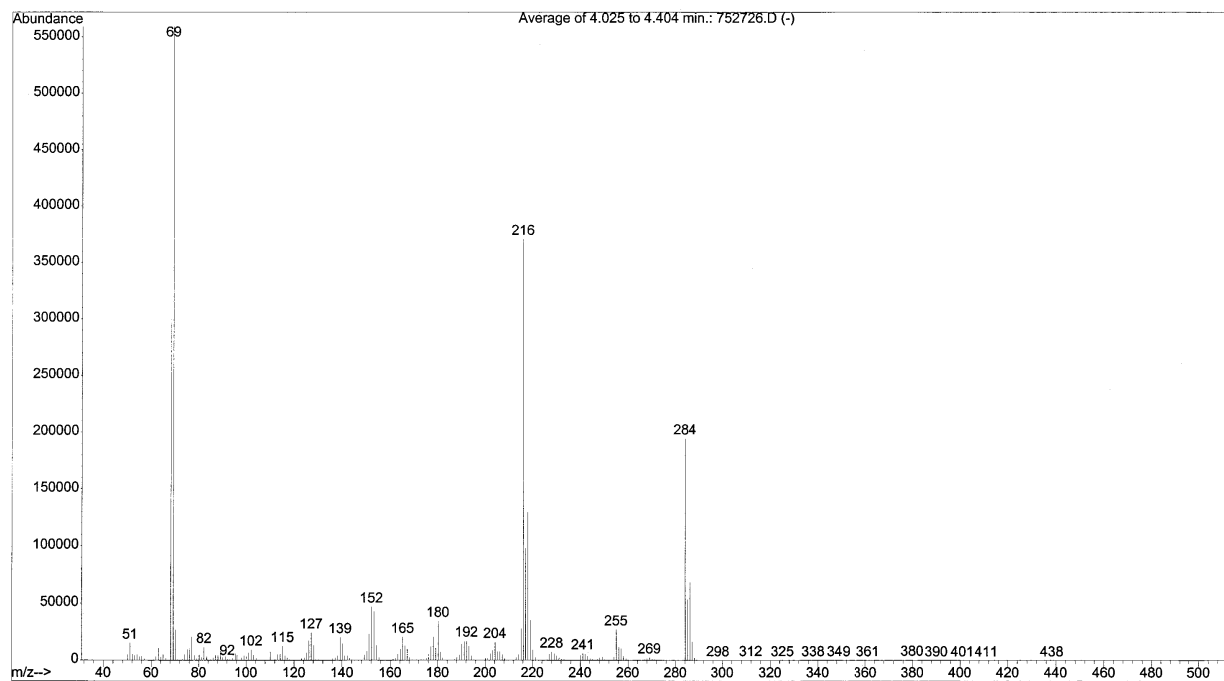

Date: Tue, Jul 17, 2001 1:37 PM  
Data: Epibatidine-17JUL101-008

5b

Sample: RTI-7527-26 (about 1 mg/ml CH<sub>3</sub>OH), A: [TFA-H<sub>2</sub>O], B: CH<sub>3</sub>CN, 25% B,  
0.6 ml/min, 225 nm, Phenomenex Synergi 4 $\mu$  Hydro-RP 80A (3\*150 mm,  
4  $\mu$ m)

Method: Epibatidine  
Inject Vol: 1  
Sampling Int: 0.1 Seconds

Data:

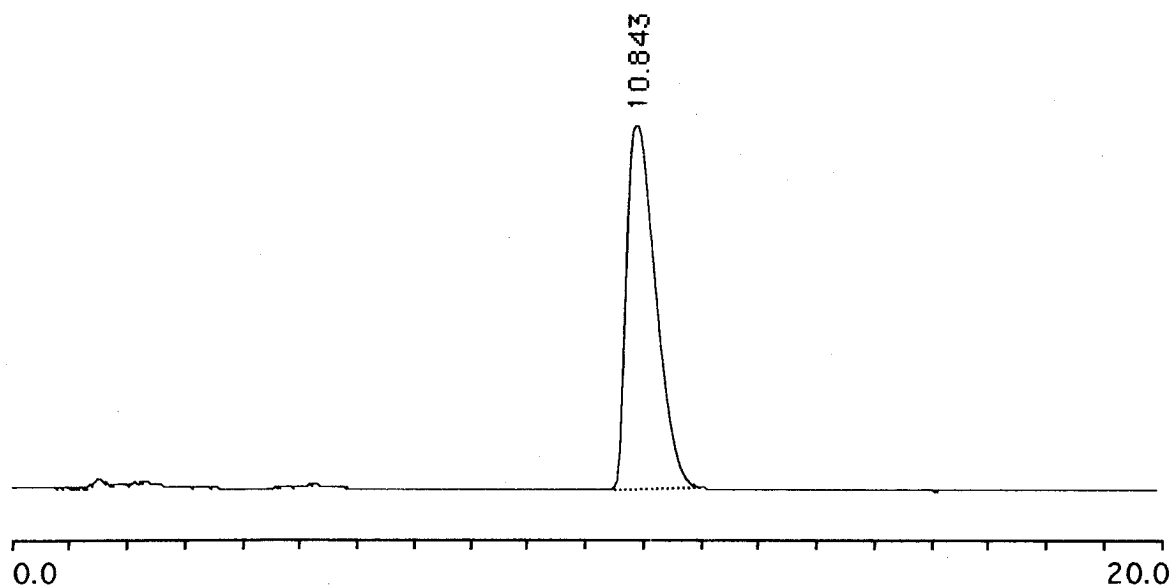

Analysis: Channel A

| Peak No.   | Time   | Type | Height( $\mu$ V) | Area( $\mu$ V-sec) | Area%          |
|------------|--------|------|------------------|--------------------|----------------|
| 1          | 10.843 | N    | 84079            | <u>2763672</u>     | <u>100.000</u> |
| Total Area |        |      |                  | 2763672            | 100.000        |

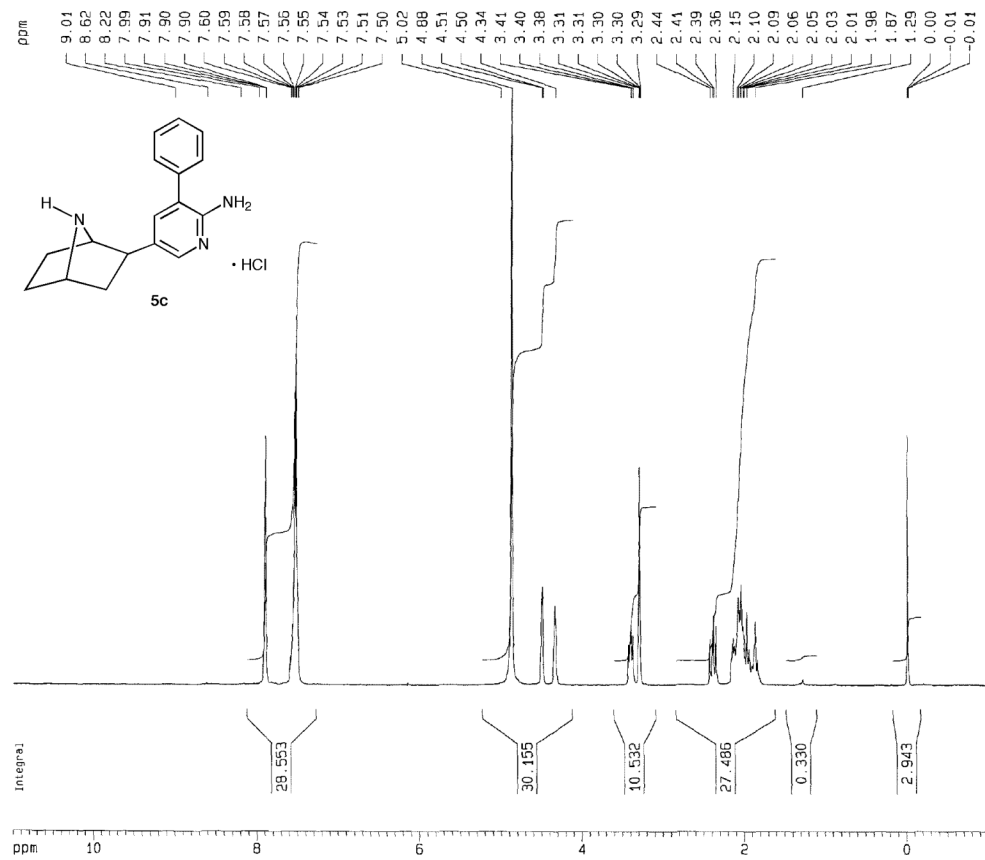

Current Data Parameters  
 NAME RT1752728  
 EXPNO 190  
 PROCNO 1

F2 - Acquisition Parameters  
 Date\_ 20010715  
 Time 15.19  
 INSTRUM spect  
 PROBHD 5 mm QNP 1H/  
 PULPROG zg  
 TD 32768  
 SOLVENT MeOH  
 NS 16  
 QS 2  
 SWH 6172.838 Hz  
 FIDRES 0.188380 Hz  
 AQ 2.6542580 sec  
 RG 456.1  
 DW 81.000 usec  
 DE 6.00 usec  
 TE 300.0 K  
 D1 1.00000000 sec  
 P1 5.50 usec  
 SFO1 300.1318534 MHz  
 NUC1 1H  
 PL1 -6.00 dB

F2 - Processing parameters  
 SI 16384  
 SF 300.1300055 MHz  
 WDM EM  
 SSB 0  
 LB 0.30 Hz  
 GB 0  
 PC 1.00

1D NMR plot parameters  
 CX 20.00 cm  
 F1P 11.000 ppm  
 F1 3301.43 Hz  
 F2P -1.000 ppm  
 F2 -300.13 Hz  
 PPMCM 0.60000 ppm/cm  
 HZCM 180.07800 Hz/cm

File : C:\HPCHEM\1\DATA\SAMPLES\752728.D  
Operator : R. Mitchell  
Acquired : 17 Jul 2001 8:57 am using AcqMethod EIDIPHED  
Instrument : GC/MS Ins  
Sample Name: RTI-7527-28  
Misc Info : Abraham  
Vial Number: 1

**5c**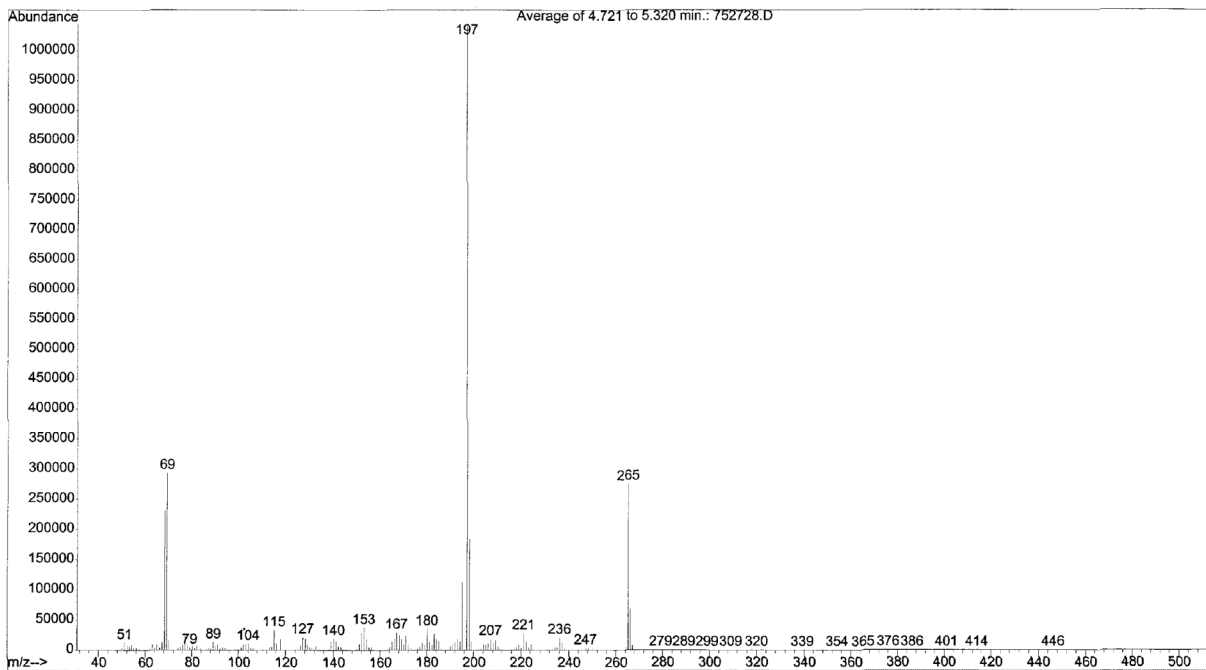



Date: Wed, Jul 18, 2001 9:20 AM

Data: Epibatidine-18JUL101-002

5c

Sample: RTI-7527-28 (about 1 mg/ml CH<sub>3</sub>OH), A: [TFA-H<sub>2</sub>O], B: CH<sub>3</sub>CN, 10% B,  
0.6 ml/min, 225 nm, Phenomenex Synergi 4 $\mu$  Hydro-RP 80A (3\*150 mm,  
4  $\mu$ m)

Method: Epibatidine

Inject Vol: 1

Sampling Int: 0.1 Seconds

Data:

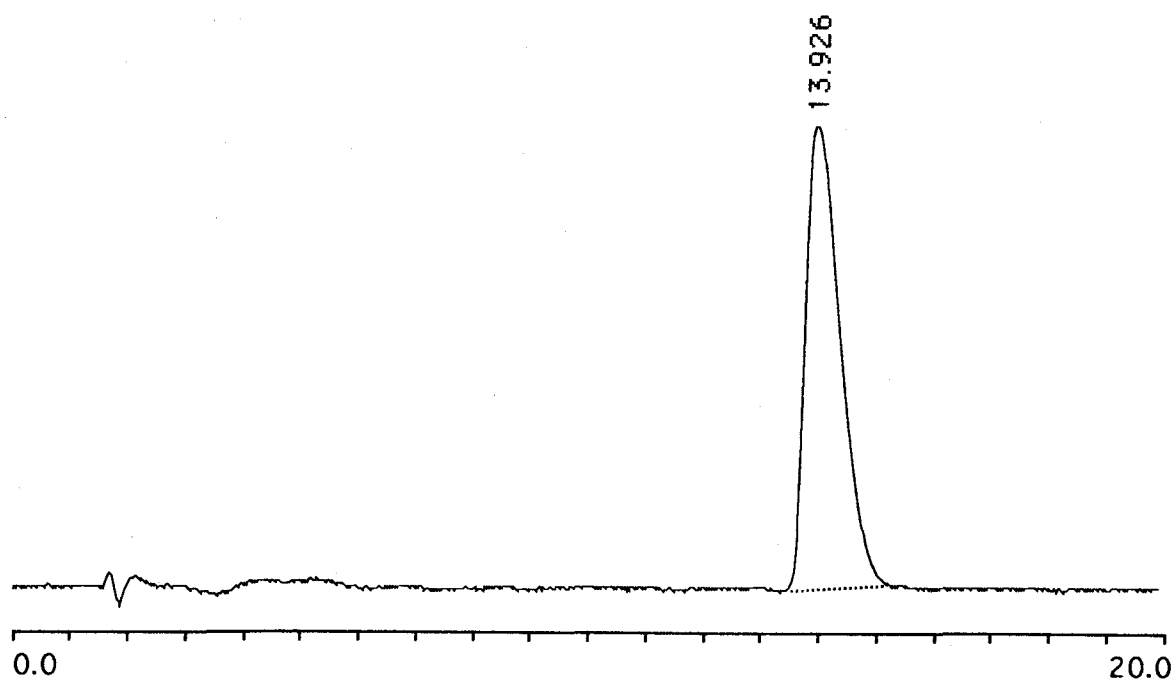

Analysis: Channel A

| Peak No.   | Time   | Type | Height( $\mu$ V) | Area( $\mu$ V-sec) | Area%   |
|------------|--------|------|------------------|--------------------|---------|
| 1          | 13.926 | N    | 34311            | 1326864            | 100.000 |
| Total Area |        |      |                  | 1326864            | 100.000 |

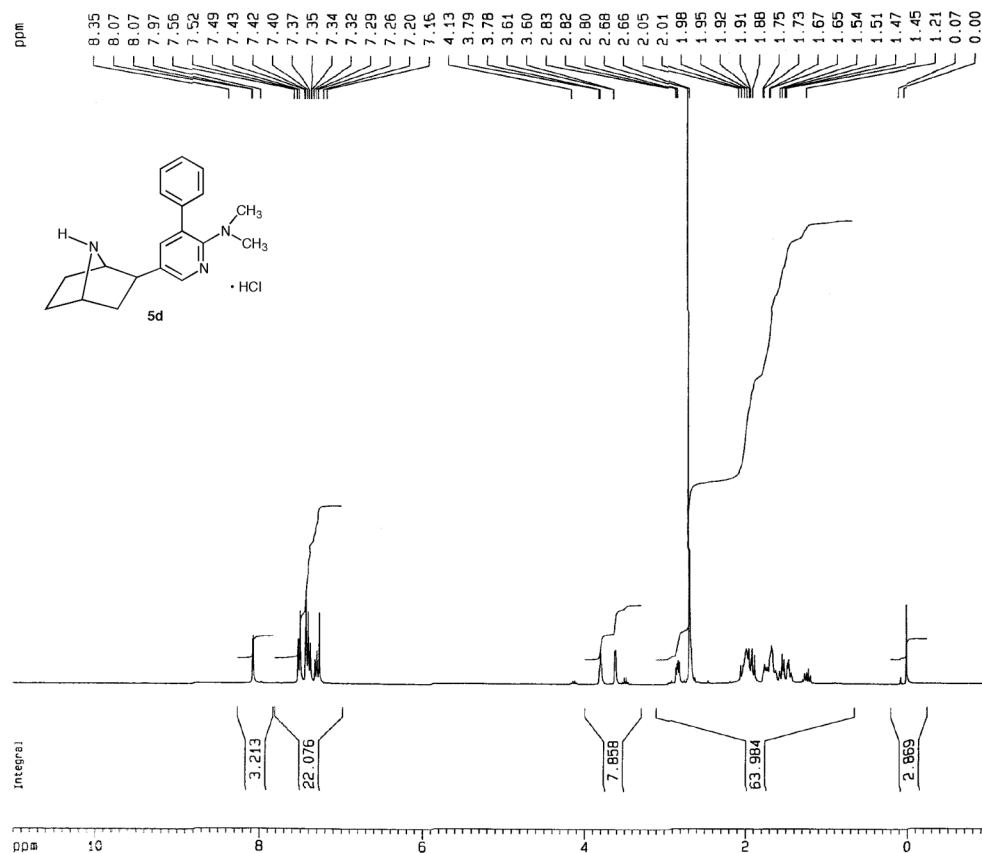

Current Data Parameters  
 NAME 1eb  
 EXPNO 180  
 PROCNO 1

F2 - Acquisition Parameters  
 Date\_ 20001206  
 Time 12.12  
 INSTRUM spect  
 PROBHD 5 mm QNP 1H/  
 PULPROG zg  
 TD 32768  
 SOLVENT CDCl3  
 NS 16  
 DS 2  
 SMH 6172.839 Hz  
 FIDRES 0.188380 Hz  
 AQ 2.6542580 sec  
 RG 456.1  
 DN 81.000 usec  
 DE 6.00 usec  
 TE 300.0 K  
 D1 1.0000000 sec  
 P1 5.50 usec  
 SF01 300.1318534 MHz  
 NUC1 1H  
 PL1 -6.00 dB

F2 - Processing parameters  
 SI 16384  
 SF 300.130051 MHz  
 WDW EM  
 SSB 0  
 LB 0.30 Hz  
 GB 0  
 PC 1.00

1D NMR plot parameters  
 CX 20.00 cm  
 F1P 11.000 ppm  
 F1 3301.43 Hz  
 F2P -1.000 ppm  
 F2 -300.13 Hz  
 PPMCM 0.60000 ppm/cm  
 HZCM 180.07800 Hz/cm

File : C:\HPCHEM\1\DATA\SAMPLES\752748.D  
Operator : R. Mitchell  
Acquired : 17 Jul 2001 10:01 am using AcqMethod EIDIPHED  
Instrument : GC/MS Ins  
Sample Name: RTI-7527-48  
Misc Info : Abraham  
Vial Number: 1

**5d**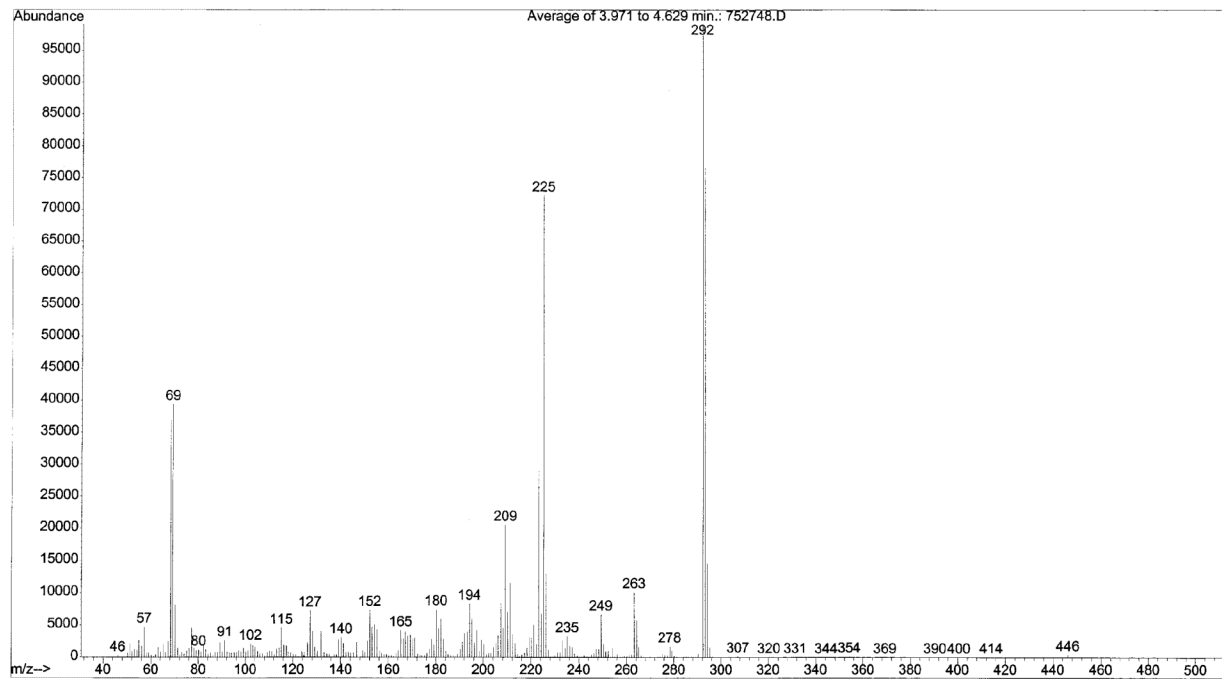

Date: Wed, Jul 18, 2001 10:07 AM

5d

Data: Epibatidine-18JUL101-003

Sample: RTI-7527-48 (about 1 mg/ml CH<sub>3</sub>OH), A: [TFA-H<sub>2</sub>O], B: CH<sub>3</sub>CN, 15% B,  
0.6 ml/min, 225 nm, Phenomenex Synergi 4 $\mu$  Hydro-RP 80A (3\*150 mm,  
4  $\mu$ m)

Method: Epibatidine

Inject Vol: 1

Sampling Int: 0.1 Seconds

Data:

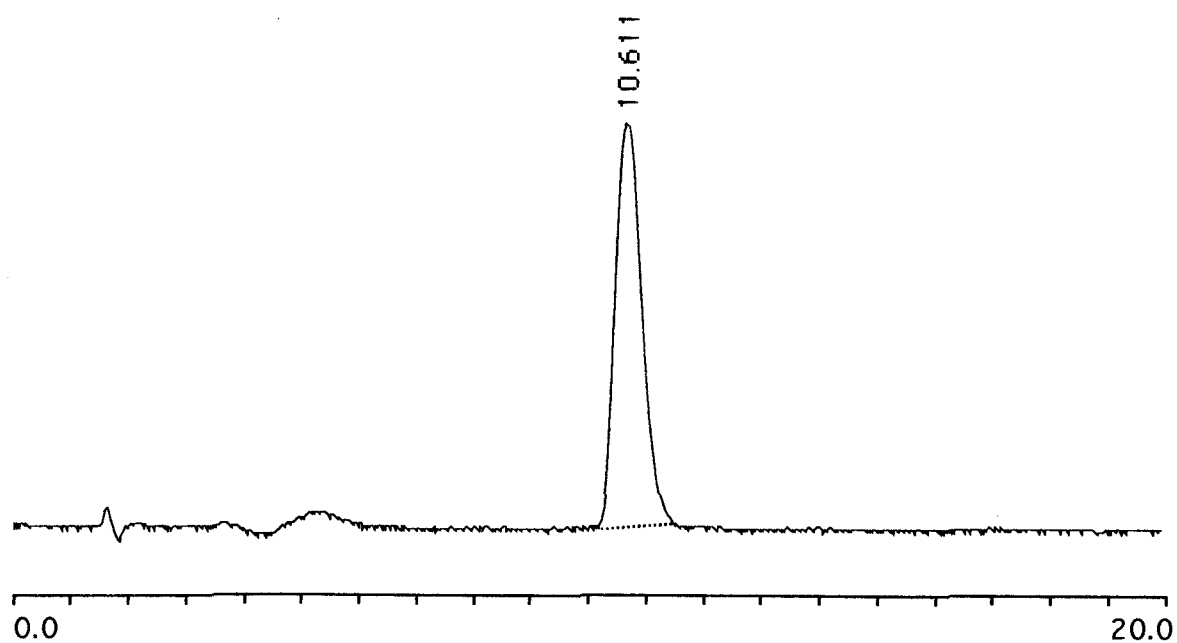

Analysis: Channel A

| Peak No.   | Time   | Type | Height( $\mu$ V) | Area( $\mu$ V-sec) | Area%   |
|------------|--------|------|------------------|--------------------|---------|
| 1          | 10.611 | N    | 16462            | 484919             | 100.000 |
| Total Area |        |      |                  | 484919             | 100.000 |
